# Supplementary material for: Physiological and biochemical responses of Emiliania huxleyi to ocean acidification and warming are modulated by UV radiation
Source: Copernicus journal article supplement (doi:10.5194/bg-2017-269), 2017-06-29
Supplement: Supplementary file [file bg-2017-269-AC2-supplement.pdf]

Response to referee #2

This MS presents a comprehensive study on the effects of multi-stressors (ocean acidification, warming and UV radiation) on biochemical characteristics and the photosynthetic activity of the coccolithophorid *Emiliana huxleyi*. Due to the complexity of the experimental setup and the numerous analyses performed, the results presented are original and they will certainly be of interest to a large readership. The different sections of the MS are overall well written. The many results are presented in clear manner in tables and figures; this latter point clearly represents a challenge of this MS. The discussion could, however, be more concise. In its present form, it contains quite a lot of repetition of the results and it is not easy to follow the order of the points that are discussed. My suggestion is to focus on the discussion of a few key findings, certainly including the effect of UV radiation.

Response: We would like to thank the reviewers' constructive comments. We will follow these suggestions to revise our discussion, focusing on key findings and making it more concise.
